# Supplementary material
Source: Research Square preprint supplement (doi:10.21203/rs.3.rs-9098684/v1)
Supplement: Supplementary file 1 [file e7c1042c6d2a746b95a82e56.pdf]

**Expert Consultation Form for *Clinical Comprehensive Evaluation of Antiretroviral Drugs for Post-occupational Exposure Prophylaxis of HIV (First Round)***

Dear Expert,  
Greetings!

The project "Clinical Comprehensive Evaluation of Antiretroviral Drugs for Post-occupational Exposure Prophylaxis of HIV" is a drug clinical comprehensive evaluation research project approved by the Guangxi Zhuang Autonomous Region Health Commission in 2023. This project aims to construct an evaluation index system based on six dimensions: safety, efficacy, economy, innovativeness, suitability, and accessibility. Centering around two main lines—technical evaluation and policy evaluation—and employing methods such as literature analysis, expert consultation/questionnaire surveys, and real-world studies, it seeks to conduct a comprehensive evaluation of commonly used antiretroviral regimens for patients with occupational HIV exposure. The goal is to provide evidence and reference for clinical treatment drug selection and decision-making regarding inclusion in the National Essential Medicines List and the National Reimbursement Drug List.

According to the Guidelines for the Management of Drug Clinical Comprehensive Evaluation (2021 Edition Trial), we have designated safety, efficacy, economy, innovativeness, suitability, and accessibility as the first-level indicators. An initial pool of evaluation indicators was developed through literature retrieval, and the Delphi method (expert consultation) will be used to modify, screen, score, and assign weights to these indicators. This process will ultimately establish the detailed scoring criteria for the clinical comprehensive value of antiretroviral drugs for post-occupational exposure prophylaxis of HIV. Given your extensive clinical experience and expertise, our research team cordially invites you to serve as an expert for this study. Your suggestions will serve as crucial evidence for our work!

This consultation form consists of four parts: basic information of the expert, importance evaluation of indicators at each level, survey on the expert's level of authority, and scoring/weighting of first-level indicators. Each indicator is rated on a scale of 1-5 based on its importance (5 = Very Important, 4 = Relatively Important, 3 = Moderately Important, 2 = Not Important, 1 = Very Unimportant). Please indicate the corresponding score based on your professional judgment by marking it clearly (with a  $\surd$ ). If you have suggestions for modification, please note them in the corresponding space; if you wish to add items, please list them in the "Addition" column.

We sincerely hope for your valuable feedback and greatly appreciate your support and assistance.

Wishing you smooth work and a pleasant life!

For any inquiries, please contact: Name: Chen Chaoguang Phone: 19158686030

Clinical Comprehensive Evaluation of Antiretroviral Drugs for Post-occupational Exposure Prophylaxis of HIV Project Team

March 2024

**Part I**

**Expert Basic Information Survey**

|                    |                                                                                                                                                             |                          |  |
|--------------------|-------------------------------------------------------------------------------------------------------------------------------------------------------------|--------------------------|--|
| Name               |                                                                                                                                                             | Age                      |  |
| Gender             |                                                                                                                                                             | Email                    |  |
| Highest Degree     |                                                                                                                                                             | Years of Work Experience |  |
| Title              |                                                                                                                                                             | Position                 |  |
| Professional Field | <input type="checkbox"/> Clinical Medicine <input type="checkbox"/> Pharmacy <input type="checkbox"/> Hospital Management<br><input type="checkbox"/> Other |                          |  |
| Work Unit          |                                                                                                                                                             |                          |  |

**Part II**

**1. Importance Evaluation of First-level Indicators**

Instructions: If you have suggestions for modification, please note them in the corresponding space; if you wish to add items, please list them in the "Addition" column. Each indicator is rated on a scale of 1-5 based on its importance (5 = Very Important, 4 = Relatively Important, 3 = Moderately Important, 2 = Not Important, 1 = Very Unimportant). Please indicate the corresponding score based on your professional judgment by marking it clearly (with a √).

| Indicator     | Modification Suggestions | Importance Score |   |   |   |   |
|---------------|--------------------------|------------------|---|---|---|---|
|               |                          | 5                | 4 | 3 | 2 | 1 |
| Effectiveness |                          | 5                | 4 | 3 | 2 | 1 |
| Safety        |                          | 5                | 4 | 3 | 2 | 1 |
| Economy       |                          | 5                | 4 | 3 | 2 | 1 |
| Innovation    |                          | 5                | 4 | 3 | 2 | 1 |
| Applicability |                          | 5                | 4 | 3 | 2 | 1 |
| Accessibility |                          | 5                | 4 | 3 | 2 | 1 |

**2. Importance Evaluation of Second-level Indicators**

Instructions: Same as above.

| Indicator     |                                  | Modification Suggestions | Importance Score |   |   |   |   |
|---------------|----------------------------------|--------------------------|------------------|---|---|---|---|
|               |                                  |                          | 5                | 4 | 3 | 2 | 1 |
| Effectiveness | Clinical Recommendation Level    |                          | 5                | 4 | 3 | 2 | 1 |
|               | Evidence-based Medicine Evidence |                          | 5                | 4 | 3 | 2 | 1 |
|               | Addition:                        |                          | 5                | 4 | 3 | 2 | 1 |
| Safety        | Incidence of Adverse             |                          | 5                | 4 | 3 | 2 | 1 |

| <b>Indicator</b>     |                                         | <b>Modification Suggestions</b> | <b>Importance Score</b> |   |   |   |   |
|----------------------|-----------------------------------------|---------------------------------|-------------------------|---|---|---|---|
|                      | Reactions                               |                                 |                         |   |   |   |   |
|                      | Evidence-based<br>Medicine Evidence     |                                 | 5                       | 4 | 3 | 2 | 1 |
|                      | Applicability in Special<br>Populations |                                 | 5                       | 4 | 3 | 2 | 1 |
|                      | Drug-Drug Interaction<br>Information    |                                 | 5                       | 4 | 3 | 2 | 1 |
|                      | Addition:                               |                                 | 5                       | 4 | 3 | 2 | 1 |
| <b>Economy</b>       | Average Daily Treatment<br>Cost         |                                 | 5                       | 4 | 3 | 2 | 1 |
|                      | Cost-Utility Analysis                   |                                 | 5                       | 4 | 3 | 2 | 1 |
|                      | Addition:                               |                                 | 5                       | 4 | 3 | 2 | 1 |
| <b>Innovation</b>    | Clinical Innovation                     |                                 | 5                       | 4 | 3 | 2 | 1 |
|                      | Service Innovation                      |                                 | 5                       | 4 | 3 | 2 | 1 |
|                      | Industrial Innovation                   |                                 | 5                       | 4 | 3 | 2 | 1 |
|                      | Addition:                               |                                 | 5                       | 4 | 3 | 2 | 1 |
| <b>Applicability</b> | Technical suitability                   |                                 | 5                       | 4 | 3 | 2 | 1 |
|                      | Prescribing<br>Appropriateness          |                                 | 5                       | 4 | 3 | 2 | 1 |
|                      | Patient compliance                      |                                 | 5                       | 4 | 3 | 2 | 1 |
|                      | Addition:                               |                                 | 5                       | 4 | 3 | 2 | 1 |
| <b>Accessibility</b> | Availability                            |                                 | 5                       | 4 | 3 | 2 | 1 |
|                      | Affordability                           |                                 | 5                       | 4 | 3 | 2 | 1 |
|                      | Addition:                               |                                 | 5                       | 4 | 3 | 2 | 1 |

### 3. Importance Evaluation of Third-level Indicators

Instructions: Same as above.

| Indicator                        |                                                           | Modification Suggestions | Importance Score |   |   |   |   |
|----------------------------------|-----------------------------------------------------------|--------------------------|------------------|---|---|---|---|
| <b>Effectiveness</b>             |                                                           |                          |                  |   |   |   |   |
| Clinical Recommendation Level    | National Diagnosis and Treatment Guidelines               |                          | 5                | 4 | 3 | 2 | 1 |
|                                  | Guideline Class I Recommendation                          |                          | 5                | 4 | 3 | 2 | 1 |
|                                  | Guideline Class II and Below Recommendation               |                          | 5                | 4 | 3 | 2 | 1 |
|                                  | Expert Consensus Recommendation                           |                          | 5                | 4 | 3 | 2 | 1 |
|                                  | Addition:                                                 |                          | 5                | 4 | 3 | 2 | 1 |
| Evidence-based Medicine Evidence | Efficacy Results Based on Systematic Review/Meta-analysis |                          | 5                | 4 | 3 | 2 | 1 |
|                                  | Clinical Efficacy in Real-World Studies                   |                          | 5                | 4 | 3 | 2 | 1 |
|                                  | Addition:                                                 |                          | 5                | 4 | 3 | 2 | 1 |
| <b>Safety</b>                    |                                                           |                          |                  |   |   |   |   |
| Incidence of Adverse Reactions   | Mild Adverse Reactions (CTC Grade 1)                      |                          | 5                | 4 | 3 | 2 | 1 |
|                                  | Moderate Adverse Reactions (CTC Grades 2-3)               |                          | 5                | 4 | 3 | 2 | 1 |
|                                  | Severe Adverse Reactions (CTC Grades 4-5)                 |                          | 5                | 4 | 3 | 2 | 1 |
|                                  | Addition:                                                 |                          | 5                | 4 | 3 | 2 | 1 |
| Evidence-based Medicine Evidence | Safety Results Based on Systematic Review/Meta-analysis   |                          | 5                | 4 | 3 | 2 | 1 |
|                                  | Safety Results in Real-World Studies                      |                          | 5                | 4 | 3 | 2 | 1 |
|                                  | Addition:                                                 |                          | 5                | 4 | 3 | 2 | 1 |
| Applicability in Special         | Applicable to the Elderly                                 |                          | 5                | 4 | 3 | 2 | 1 |
|                                  | Applicable to Pregnant                                    |                          | 5                | 4 | 3 | 2 | 1 |

| Indicator                         |                                                                             | Modification Suggestions | Importance Score |   |   |   |   |
|-----------------------------------|-----------------------------------------------------------------------------|--------------------------|------------------|---|---|---|---|
| Populations                       | Women                                                                       |                          |                  |   |   |   |   |
|                                   | Applicable to Lactating Women                                               |                          | 5                | 4 | 3 | 2 | 1 |
|                                   | Applicable to Individuals with Liver Impairment                             |                          | 5                | 4 | 3 | 2 | 1 |
|                                   | Applicable to Individuals with Renal Impairment                             |                          | 5                | 4 | 3 | 2 | 1 |
|                                   | Addition:                                                                   |                          | 5                | 4 | 3 | 2 | 1 |
| Drug-Drug Interaction Information | Resulting Adverse Reactions Mild/Moderate, No Dose Adjustment Required      |                          | 5                | 4 | 3 | 2 | 1 |
|                                   | Resulting Adverse Reactions Severe, Dose Adjustment Required                |                          | 5                | 4 | 3 | 2 | 1 |
|                                   | Contraindication: Prohibited to Take Concurrently                           |                          | 5                | 4 | 3 | 2 | 1 |
|                                   | Addition:                                                                   |                          | 5                | 4 | 3 | 2 | 1 |
| <b>Economy</b>                    |                                                                             |                          |                  |   |   |   |   |
| Average Daily Treatment Cost      | Lowest Daily Treatment Cost                                                 |                          | 5                | 4 | 3 | 2 | 1 |
|                                   | Medium Daily Treatment Cost                                                 |                          | 5                | 4 | 3 | 2 | 1 |
|                                   | Highest Daily Treatment Cost                                                |                          | 5                | 4 | 3 | 2 | 1 |
| Cost-Utility Analysis             | Direct Medical Costs                                                        |                          | 5                | 4 | 3 | 2 | 1 |
|                                   | Quality-Adjusted Life Years (QALYs)                                         |                          | 5                | 4 | 3 | 2 | 1 |
|                                   | Addition:                                                                   |                          | 5                | 4 | 3 | 2 | 1 |
| <b>Innovation</b>                 |                                                                             |                          |                  |   |   |   |   |
| Clinical Innovation               | Fills the Gap in Clinical Prevention/Treatment of Occupational HIV Exposure |                          | 5                | 4 | 3 | 2 | 1 |
|                                   | Demonstrates Significant Superiority                                        |                          | 5                | 4 | 3 | 2 | 1 |

| Indicator          |                                                                                                                                                                                 | Modification Suggestions | Importance Score |   |   |   |   |
|--------------------|---------------------------------------------------------------------------------------------------------------------------------------------------------------------------------|--------------------------|------------------|---|---|---|---|
|                    | (e.g., in Safety, Efficacy, or Practicality) Compared to Existing Drugs for HIV Occupational Exposure Prevention/Treatment                                                      |                          |                  |   |   |   |   |
|                    | Represents a Novel Mechanism of Action in the Field of HIV Occupational Exposure Treatment                                                                                      |                          | 5                | 4 | 3 | 2 | 1 |
|                    | Technological Innovation (in aspects such as treatment regimen, applicable population, dosing interval, dosage form, administration route, split packaging, storage conditions) |                          | 5                | 4 | 3 | 2 | 1 |
|                    | Addition:                                                                                                                                                                       |                          | 5                | 4 | 3 | 2 | 1 |
| Service Innovation | Optimizes the Diagnosis and Treatment Service Process for Occupational HIV Exposure, Improving Efficiency in Activities such as Service Appointment, Utilization, and Follow-up |                          | 5                | 4 | 3 | 2 | 1 |
|                    | Improves the Utilization Efficiency of Regional or Institutional Diagnosis and Treatment Service Resources for Occupational HIV Exposure                                        |                          | 5                | 4 | 3 | 2 | 1 |
|                    | Addition:                                                                                                                                                                       |                          | 5                | 4 | 3 | 2 | 1 |
| Industrial         | Self-developed Original                                                                                                                                                         |                          | 5                | 4 | 3 | 2 | 1 |

| Indicator                   |                                                                        | Modification Suggestions | Importance Score |   |   |   |   |
|-----------------------------|------------------------------------------------------------------------|--------------------------|------------------|---|---|---|---|
| Innovation                  | Drug or Globally First Generic Drug                                    |                          |                  |   |   |   |   |
|                             | Granted Domestic Patent for Drug Structure or Formulation Process      |                          | 5                | 4 | 3 | 2 | 1 |
|                             | Granted International Patent for Drug Structure or Formulation Process |                          | 5                | 4 | 3 | 2 | 1 |
|                             | Addition:                                                              |                          | 5                | 4 | 3 | 2 | 1 |
| <b>Applicability</b>        |                                                                        |                          |                  |   |   |   |   |
| Technical suitability       | Drug Packaging and Labeling Information                                |                          | 5                | 4 | 3 | 2 | 1 |
|                             | Drug Shelf Life                                                        |                          | 5                | 4 | 3 | 2 | 1 |
|                             | Storage Conditions                                                     |                          | 5                | 4 | 3 | 2 | 1 |
|                             | Addition:                                                              |                          | 5                | 4 | 3 | 2 | 1 |
| Prescribing Appropriateness | Drug Efficacy Precisely Corresponds to Indication                      |                          | 5                | 4 | 3 | 2 | 1 |
|                             | Dosing is Easy to Master                                               |                          | 5                | 4 | 3 | 2 | 1 |
|                             | Contraindications are Easy to Exclude                                  |                          | 5                | 4 | 3 | 2 | 1 |
|                             | Patient Medication Tolerance is Low                                    |                          | 5                | 4 | 3 | 2 | 1 |
|                             | Addition:                                                              |                          | 5                | 4 | 3 | 2 | 1 |
| Patient compliance          | Palatability                                                           |                          | 5                | 4 | 3 | 2 | 1 |
|                             | Appropriate Size and Shape                                             |                          | 5                | 4 | 3 | 2 | 1 |
|                             | Appropriate Dosage Form                                                |                          | 5                | 4 | 3 | 2 | 1 |
|                             | Appropriate Dosing Frequency                                           |                          | 5                | 4 | 3 | 2 | 1 |
|                             | Appropriate Treatment Duration                                         |                          | 5                | 4 | 3 | 2 | 1 |
|                             | Addition:                                                              |                          | 5                | 4 | 3 | 2 | 1 |
| <b>Accessibility</b>        |                                                                        |                          |                  |   |   |   |   |
| Availability                | Regional Coverage                                                      |                          | 5                | 4 | 3 | 2 | 1 |
|                             | Hospital Coverage                                                      |                          | 5                | 4 | 3 | 2 | 1 |
|                             | Community Pharmacy Coverage                                            |                          | 5                | 4 | 3 | 2 | 1 |

| Indicator     |                                                                                                          | Modification Suggestions | Importance Score |   |   |   |   |
|---------------|----------------------------------------------------------------------------------------------------------|--------------------------|------------------|---|---|---|---|
|               | Addition:                                                                                                |                          | 5                | 4 | 3 | 2 | 1 |
| Affordability | National Medical Insurance Reimbursement Status                                                          |                          | 5                | 4 | 3 | 2 | 1 |
|               | Proportion of Annual Per Capita Drug Treatment Cost to Annual Per Capita Disposable Income of Households |                          | 5                | 4 | 3 | 2 | 1 |
|               | Addition:                                                                                                |                          | 5                | 4 | 3 | 2 | 1 |

### Part III

#### 1. Expert's Basis of Judgment

Instructions: When evaluating the above indicators, what is the degree of influence each of the following four bases of judgment had on your assessment? Please indicate by marking  $\checkmark$  in the corresponding column.

| Basis of Judgment                                | Degree of Influence on Expert Judgment |        |     |
|--------------------------------------------------|----------------------------------------|--------|-----|
|                                                  | High                                   | Medium | Low |
| Practical Experience                             |                                        |        |     |
| Theoretical Analysis                             |                                        |        |     |
| Reference to Domestic & International Literature |                                        |        |     |
| Intuition                                        |                                        |        |     |

#### 2. Expert's Familiarity with the Six Dimension Indicators

Instructions: Please mark  $\checkmark$  in the appropriate column.

| Familiarity   | Very Familiar | Relatively Familiar | Moderately Familiar | Somewhat Unfamiliar | Very Unfamiliar |
|---------------|---------------|---------------------|---------------------|---------------------|-----------------|
| Effectiveness |               |                     |                     |                     |                 |
| Safety        |               |                     |                     |                     |                 |
| Economy       |               |                     |                     |                     |                 |
| Innovation    |               |                     |                     |                     |                 |
| Applicability |               |                     |                     |                     |                 |
| Accessibility |               |                     |                     |                     |                 |

### Part IV

### 1. Scoring and Weighting of First-level Indicators

Instructions: Please rank Effectiveness, Safety, Economy, Innovation, Applicability, Accessibility in order of importance (from left to right, decreasing importance; if equal, no order is needed). Then, assign scores and weights (using a percentage system, where the total sum of weights equals 100).

|                            |  |  |  |  |  |  |
|----------------------------|--|--|--|--|--|--|
| Ranking                    |  |  |  |  |  |  |
| Score/Weight<br>Assignment |  |  |  |  |  |  |

**Expert Consultation Form for *Clinical Comprehensive Evaluation of Antiretroviral Drugs for Post-occupational Exposure Prophylaxis of HIV* (Second Round)**

Dear Expert,  
Greetings!

Thank you for participating in the first round of consultation! This round will provide feedback on the statistical results and invite you to conduct a final evaluation of the revised indicator system and assign weights using the Analytic Hierarchy Process (AHP).

Indicators in red font have been modified based on comprehensive expert opinions. Please rate these indicators. A total of 5 indicators have been modified. Indicators with a coefficient of variation (Cv) > 0.4 from the first Delphi round results have been deleted.

This consultation form consists of four parts: basic information of the expert, feedback on first-round Delphi results and scoring of modified indicators, survey on the expert's level of authority, and expert consultation on indicator weights using the Analytic Hierarchy Process.

We sincerely hope for your valuable feedback and greatly appreciate your support and assistance.

Wishing you smooth work and a pleasant life!

For any inquiries, please contact: Name: Chen Chaoguang Phone: 19158686030

Clinical Comprehensive Evaluation of Antiretroviral Drugs for Post-occupational Exposure Prophylaxis of HIV Project Team  
May 2025

**Part I**

**Expert Basic Information Survey**

|                    |                                                                                                                                                             |                          |  |
|--------------------|-------------------------------------------------------------------------------------------------------------------------------------------------------------|--------------------------|--|
| Name               |                                                                                                                                                             | Age                      |  |
| Gender             |                                                                                                                                                             | Email                    |  |
| Highest Degree     |                                                                                                                                                             | Years of Work Experience |  |
| Title              |                                                                                                                                                             | Position                 |  |
| Professional Field | <input type="checkbox"/> Clinical Medicine <input type="checkbox"/> Pharmacy <input type="checkbox"/> Hospital Management<br><input type="checkbox"/> Other |                          |  |
| Work Unit          |                                                                                                                                                             |                          |  |

**Part II**

**1. First-level Indicator Results Feedback (This section does not require filling)**

| Indicator     | Mean | Standard Deviation | Coefficient of Variation (Cv) | Adopted |
|---------------|------|--------------------|-------------------------------|---------|
| Effectiveness | 4.50 | 1.0                | 0.22                          | Yes     |
| Safety        | 5.0  | 0                  | 0                             | Yes     |
| Economy       | 4.08 | 1.0                | 0.24                          | Yes     |
| Innovation    | 3.50 | 0.80               | 0.23                          | Yes     |
| Applicability | 4.33 | 0.78               | 0.18                          | Yes     |
| Accessibility | 3.75 | 1.28               | 0.34                          | Yes     |

## 2. Second-level Indicator Results Feedback

Indicators in red are modified. Please rate these indicators: 1-5 points (5 = Very Important, 4 = Relatively Important, 3 = Moderately Important, 2 = Not Important, 1 = Very Unimportant)

|                      | Original Indicator               | Modification Suggestions                                                                    | Mean        | Std. Dev. | Cv   | Adopted |
|----------------------|----------------------------------|---------------------------------------------------------------------------------------------|-------------|-----------|------|---------|
| <b>Effectiveness</b> | Clinical Recommendation Level    | -                                                                                           | 4.92        | 0.29      | 0.06 | Yes     |
|                      | Evidence-based Medicine Evidence | Clinical Efficacy Based on Systematic Review/Meta-analyses                                  | Your Score: |           |      |         |
|                      |                                  | Clinical Efficacy Based on Real-World Studies (data collected within Guangxi in this study) | Your Score: |           |      |         |
| <b>Safety</b>        | Incidence of Adverse Reactions   | Incidence of Adverse Reactions in Package Insert (CTC Grades 3-5)                           | Your Score: |           |      |         |
|                      | Evidence-based Medicine Evidence | Post-marketing Relative Safety Based on Systematic Review/Meta-analyses                     | Your Score: |           |      |         |

|                      |                                         | Relative Safety<br>Based on Real-World<br>Studies (data<br>collected within<br>Guangxi in this<br>study) | Your Score: |      |          |     |
|----------------------|-----------------------------------------|----------------------------------------------------------------------------------------------------------|-------------|------|----------|-----|
|                      | Applicability in<br>Special Populations | -                                                                                                        | 4.17        | 0.58 | 0.1<br>4 | Yes |
|                      | Drug-Drug<br>Interaction<br>Information | -                                                                                                        | 3.92        | 0.9  | 0.2<br>3 | Yes |
| <b>Economy</b>       | Average Daily<br>Treatment Cost         | -                                                                                                        | 4.67        | 0.89 | 0.1<br>9 | Yes |
|                      | Cost-Utility<br>Analysis                | -                                                                                                        | 4.10        | 0.99 | 0.2<br>4 | Yes |
| <b>Innovation</b>    | Clinical Innovation                     | -                                                                                                        | 4.25        | 1.06 | 0.2<br>5 | Yes |
|                      | Service Innovation                      | -                                                                                                        | 2.42        | 1.0  | 0.4<br>1 | No  |
|                      | Industrial<br>Innovation                | -                                                                                                        | 3.25        | 1.22 | 0.3<br>7 | Yes |
| <b>Applicability</b> | Technical<br>suitability                | -                                                                                                        | 4.33        | 0.78 | 0.1<br>8 | Yes |
|                      | Prescribing<br>Appropriateness          | -                                                                                                        | 4.17        | 0.94 | 0.2<br>2 | Yes |
|                      | Patient compliance                      | -                                                                                                        | 4.67        | 0.49 | 0.11     | Yes |
| <b>Accessibility</b> | Availability                            | -                                                                                                        | 4.50        | 0.80 | 0.1<br>8 | Yes |
|                      | Affordability                           | -                                                                                                        | 4.0         | 0.95 | 0.2<br>4 | Yes |

### Part III

#### 1. Expert's Basis of Judgment

Instructions: When evaluating the above indicators, what is the degree of influence each

of the following four bases of judgment had on your assessment? Please indicate by marking  $\checkmark$  in the corresponding column.

| Basis of Judgment                                | Degree of Influence on Expert Judgment |        |     |
|--------------------------------------------------|----------------------------------------|--------|-----|
|                                                  | High                                   | Medium | Low |
| Practical Experience                             |                                        |        |     |
| Theoretical Analysis                             |                                        |        |     |
| Reference to Domestic & International Literature |                                        |        |     |
| Intuition                                        |                                        |        |     |

## 2. Expert's Familiarity with the Indicators

Instructions: Please mark  $\checkmark$  in the appropriate column.

| Familiarity | Very Familiar | Relatively Familiar | Moderately Familiar | Somewhat Unfamiliar | Very Unfamiliar |
|-------------|---------------|---------------------|---------------------|---------------------|-----------------|
| Your Choice |               |                     |                     |                     |                 |

## Part IV

This study plans to use the Analytic Hierarchy Process (AHP) to compare the relative importance of indicators at each level in pairs. AHP is used to determine the weights of various elements. It decomposes a complex problem into multiple levels and determines their relative importance through expert pairwise comparisons of elements at different levels. The scoring criteria for each level refer to the "Saaty Relative Importance Scale". Please choose the appropriate ratio based on your understanding. Thank you for your support!

Saaty Relative Importance Scale

| Scale Value       | Definition                                    |
|-------------------|-----------------------------------------------|
| $a_{ij}=1$        | Equal importance of elements $*i*$ and $*j*$  |
| $a_{ij}=3$        | $*i*$ moderately more important than $*j*$    |
| $a_{ij}=5$        | $*i*$ strongly more important than $*j*$      |
| $a_{ij}=7$        | $*i*$ very strongly more important than $*j*$ |
| $a_{ij}=9$        | $*i*$ absolutely more important than $*j*$    |
| $a_{ij}=2,4,6,8$  | Intermediate values                           |
| Reciprocal values | If $a_{ij} = k$ , then $a_{ji} = 1/k$         |

Scoring Requirements:

(1) Scoring is divided into 9 levels. 9 = Extremely Important, 7 = Strongly Important, 5 = Moderately Important, 3 = Slightly Important, 1 = Equally Important. 2, 4, 6, 8 are intermediate values between the above judgments.

(2) Scoring must satisfy the consistency principle for factors at the same level. For example, if  $A > B$  and  $B > C$ , then  $A > C$ .

### 1. First-level Indicator Judgment Matrix

Instructions: - represents the corresponding reciprocal, no need to fill. To ensure consistency, it is recommended to first rank these 6 indicators by importance before pairwise comparison.

| Indicator     | Effectiveness | Safety | Economy | Innovation | Applicability | Accessibility |
|---------------|---------------|--------|---------|------------|---------------|---------------|
| Effectiveness | 1             | -      | -       | -          | -             | -             |
| Safety        |               | 1      | -       | -          | -             | -             |
| Economy       |               |        | 1       | -          | -             | -             |
| Innovation    |               |        |         | 1          | -             | -             |
| Applicability |               |        |         |            | 1             | -             |
| Accessibility |               |        |         |            |               | 1             |

### 2. Second-level Indicator Judgment Matrices

2.1 Pairwise comparison of the importance of the 3 indicators under the first-level indicator "Efficacy" (To ensure consistency, it is recommended to first rank these 3 indicators by importance before pairwise comparison.)

| Indicator                                                  | Clinical Recommendation Level | Clinical Efficacy Based on Systematic Review/Meta-analysis | Clinical Efficacy Based on Real-World Studies |
|------------------------------------------------------------|-------------------------------|------------------------------------------------------------|-----------------------------------------------|
| Clinical Recommendation Level                              | 1                             | -                                                          | -                                             |
| Clinical Efficacy Based on Systematic Review/Meta-analysis |                               | 1                                                          | -                                             |
| Clinical Efficacy Based on Real-World Studies              |                               |                                                            | 1                                             |

2.2 Pairwise comparison of the importance of the 5 indicators under the first-level indicator "Safety" (To ensure consistency, it is recommended to first rank these 5 indicators by importance before pairwise comparison.)

| Indicator | Incidence of Adverse | Post-marketing Relative Safety Based on Systematic | Relative Safety Based on | Applicability in Special Populations | Drug-Drug Interaction Information |
|-----------|----------------------|----------------------------------------------------|--------------------------|--------------------------------------|-----------------------------------|
|           |                      |                                                    |                          |                                      |                                   |

|                                                                         | Reactions in Package Insert | Review/Meta-analysis | Real-World Studies |   | n |
|-------------------------------------------------------------------------|-----------------------------|----------------------|--------------------|---|---|
| Incidence of Adverse Reactions in Package Insert                        | 1                           | -                    | -                  | - | - |
| Post-marketing Relative Safety Based on Systematic Review/Meta-analysis |                             | 1                    | -                  | - | - |
| Relative Safety Based on Real-World Studies                             |                             |                      | 1                  | - | - |
| Applicability in Special Populations                                    |                             |                      |                    | 1 | - |
| Drug-Drug Interaction Information                                       |                             |                      |                    |   | 1 |

2.3 Pairwise comparison of the importance of the 2 indicators under the first-level indicator "Economy" (To ensure consistency, it is recommended to first rank these 2 indicators by importance before pairwise comparison.)

| Indicator                    | Average Daily Treatment Cost | Cost-Utility Analysis |
|------------------------------|------------------------------|-----------------------|
| Average Daily Treatment Cost | 1                            | -                     |
| Cost-Utility Analysis        |                              | 1                     |

2.4 Pairwise comparison of the importance of the 2 indicators under the first-level indicator "Innovativeness" (To ensure consistency, it is recommended to first rank these 2 indicators by importance before pairwise comparison.)

| Indicator             | Clinical Innovation | Industrial Innovation |
|-----------------------|---------------------|-----------------------|
| Clinical Innovation   | 1                   | -                     |
| Industrial Innovation |                     | 1                     |

2.5 Pairwise comparison of the importance of the 3 indicators under the first-level indicator "Suitability" (To ensure consistency, it is recommended to first rank these 3 indicators by importance before pairwise comparison.)

| Indicator | Technical suitability | Prescribing Appropriateness | Patient compliance |
|-----------|-----------------------|-----------------------------|--------------------|
|           |                       |                             |                    |

|                                |   |   |   |
|--------------------------------|---|---|---|
| Technical suitability          | 1 | - | - |
| Prescribing<br>Appropriateness |   | 1 | - |
| Patient compliance             |   |   | 1 |

2.6 Pairwise comparison of the importance of the 2 indicators under the first-level indicator "Accessibility" (To ensure consistency, it is recommended to first rank these 2 indicators by importance before pairwise comparison.)

| Indicator     | Availability | Affordability |
|---------------|--------------|---------------|
| Availability  | 1            | -             |
| Affordability |              | 1             |
